# Supplementary material for: Genotypic variation in spike fertility traits and ovary size as determinants of floret and grain survival rate in wheat
Source: PubMed Central journal article supplement (PMC5301927; doi:10.1093/jxb/erw200), 2016-06-08
Supplement: supp_erw200_Supplementary_Tables_S1_S5_Figures_S1_S5.pdf [file supp_erw200_Supplementary_Tables_S1_S5_Figures_S1_S5.pdf]

## Supplementary materials

**Table S1.** Marker information for all 30 cultivars used.

| Running number | Cultivar name | <i>Rht-B1</i> (+/-)* | <i>Rht-D1</i> (+/-)* | <i>Ppd-D1</i> (+/-) <sup>§</sup> |
|----------------|---------------|----------------------|----------------------|----------------------------------|
| 1              | Bussard       | -                    | -                    | -                                |
| 2              | Tukan         | -                    | +                    | +                                |
| 3              | Tulsa         | +                    | -                    | +                                |
| 4              | Türkis        | -                    | +                    | +                                |
| 5              | Winnetou      | -                    | -                    | +                                |
| 6              | Zentos        | -                    | -                    | +                                |
| 7              | Zobel         | -                    | +                    | +                                |
| 8              | Cliff         | -                    | +                    | +                                |
| 9              | Dream         | -                    | -                    | +                                |
| 10             | Florett       | -                    | +                    | +                                |
| 11             | History       | -                    | -                    | +                                |
| 12             | Lindos        | -                    | -                    | +                                |
| 13             | Julius        | -                    | +                    | +                                |
| 14             | Exotic        | -                    | +                    | -                                |
| 15             | Andalou       | -                    | +                    | -                                |
| 16             | Loch          | -                    | +                    | +                                |
| 17             | Acienda       | -                    | +                    | -                                |
| 18             | Aguila        | -                    | +                    | -                                |
| 19             | Alcazar       | -                    | +                    | +                                |
| 20             | Allister      | -                    | +                    | +                                |
| 21             | Arack         | -                    | +                    | +                                |
| 22             | Arobase       | -                    | +                    | +                                |
| 23             | Astuce        | -                    | +                    | +                                |
| 24             | Aubusson      | -                    | +                    | +                                |
| 25             | Autan         | -                    | +                    | -                                |
| 26             | Azimet        | -                    | +                    | -                                |
| 27             | Azzuro        | -                    | +                    | +                                |
| 28             | Balance       | -                    | +                    | +                                |
| 29             | Baltimor      | -                    | +                    | +                                |
| 30             | Bastide       | -                    | +                    | +                                |

\* (+) indicates the presence of a semi-dwarfing allele

<sup>§</sup> (+) indicates the presence of the photoperiod-sensitive allele at the *Ppd-D1* locus.

**Table S2.** Maximum number of floret primordia and fertile floret number in apical, central and basal spikelets for individual genotype of all the 30 cultivars in the greenhouse (mean  $\pm$  standard deviation).

| Genotype  | Apical max      | Central max      | Basal max        | Apical fertile  | Central fertile | Basal fertile   |
|-----------|-----------------|------------------|------------------|-----------------|-----------------|-----------------|
| Bussard   | 9.00 $\pm$ 1.00 | 10.00 $\pm$ 1.00 | 9.33 $\pm$ 0.58  | 3.33 $\pm$ 0.58 | 4.33 $\pm$ 0.58 | 4.00 $\pm$ 1.00 |
| Tukan     | 8.33 $\pm$ 0.58 | 9.67 $\pm$ 0.58  | 9.00 $\pm$ 0.00  | 4.00 $\pm$ 0.00 | 4.67 $\pm$ 0.58 | 4.67 $\pm$ 0.58 |
| Tulsa     | 8.50 $\pm$ 0.71 | 10.00 $\pm$ 0.00 | 10.00 $\pm$ 0.00 | 4.00 $\pm$ 1.00 | 4.67 $\pm$ 0.58 | 5.00 $\pm$ 1.00 |
| Türkis    | 9.33 $\pm$ 1.15 | 9.67 $\pm$ 0.58  | 9.67 $\pm$ 0.58  | 4.00 $\pm$ 0.00 | 4.33 $\pm$ 0.58 | 4.33 $\pm$ 0.58 |
| Winnetou  | 9.00 $\pm$ 1.00 | 10.33 $\pm$ 0.58 | 10.00 $\pm$ 0.00 | 4.33 $\pm$ 1.15 | 6.00 $\pm$ 0.00 | 5.67 $\pm$ 0.58 |
| Zentos    | 8.67 $\pm$ 0.58 | 10.33 $\pm$ 0.58 | 9.67 $\pm$ 0.58  | 3.33 $\pm$ 0.58 | 5.33 $\pm$ 0.58 | 5.00 $\pm$ 0.00 |
| Zobel     | 9.67 $\pm$ 0.58 | 10.67 $\pm$ 0.58 | 10.00 $\pm$ 1.00 | 4.00 $\pm$ 0.00 | 4.67 $\pm$ 0.58 | 4.00 $\pm$ 0.00 |
| Cliff     | 9.00 $\pm$ 0.00 | 9.00 $\pm$ 0.00  | 11.00 $\pm$ 0.00 | 4.00 $\pm$ 0.00 | 5.33 $\pm$ 0.58 | 5.33 $\pm$ 0.58 |
| Dream     | 8.67 $\pm$ 0.58 | 10.00 $\pm$ 0.00 | 9.67 $\pm$ 0.58  | 4.00 $\pm$ 1.41 | 5.50 $\pm$ 0.71 | 5.00 $\pm$ 0.00 |
| Florett   | 8.33 $\pm$ 0.58 | 10.00 $\pm$ 1.00 | 9.00 $\pm$ 1.00  | 4.00 $\pm$ 0.00 | 5.33 $\pm$ 0.58 | 5.00 $\pm$ 0.00 |
| History   | 9.33 $\pm$ 0.58 | 9.67 $\pm$ 0.58  | 9.00 $\pm$ 0.00  | 4.00 $\pm$ 0.00 | 5.00 $\pm$ 0.00 | 5.67 $\pm$ 0.58 |
| Lindos    | 8.33 $\pm$ 0.58 | 10.00 $\pm$ 0.00 | 9.00 $\pm$ 0.00  | 4.00 $\pm$ 0.00 | 5.00 $\pm$ 0.00 | 5.00 $\pm$ 0.00 |
| Julius    | 9.00 $\pm$ 1.00 | 9.67 $\pm$ 0.58  | 10.00 $\pm$ 0.00 | 3.00 $\pm$ 0.00 | 4.00 $\pm$ 0.00 | 4.00 $\pm$ 0.00 |
| Exotic    | 7.67 $\pm$ 1.15 | 8.33 $\pm$ 0.58  | 8.00 $\pm$ 1.00  | 3.33 $\pm$ 0.58 | 3.67 $\pm$ 0.58 | 3.33 $\pm$ 0.58 |
| Andalou   | 9.00 $\pm$ 0.00 | 10.00 $\pm$ 0.00 | 9.00 $\pm$ 0.00  | 3.00 $\pm$ 0.00 | 4.00 $\pm$ 0.00 | 3.67 $\pm$ 0.58 |
| Loch 3754 |                 |                  |                  |                 |                 |                 |
| Adlon     | 8.33 $\pm$ 0.58 | 10.00 $\pm$ 0.00 | 9.33 $\pm$ 0.58  | 5.33 $\pm$ 0.58 | 6.00 $\pm$ 0.00 | 5.33 $\pm$ 0.58 |
| Acienda   | 9.00 $\pm$ 0.00 | 9.33 $\pm$ 1.15  | 9.00 $\pm$ 1.00  | 4.33 $\pm$ 0.58 | 5.00 $\pm$ 0.00 | 4.33 $\pm$ 0.58 |
| Aguila    | 8.33 $\pm$ 1.15 | 9.00 $\pm$ 0.00  | 9.00 $\pm$ 0.00  | 3.67 $\pm$ 0.58 | 4.67 $\pm$ 0.58 | 4.00 $\pm$ 0.00 |
| Alcasar   | 8.67 $\pm$ 0.58 | 9.67 $\pm$ 0.58  | 9.67 $\pm$ 0.58  | 4.00 $\pm$ 0.00 | 5.00 $\pm$ 0.00 | 4.67 $\pm$ 0.58 |
| Allister  | 9.00 $\pm$ 0.00 | 9.67 $\pm$ 0.58  | 9.00 $\pm$ 1.00  | 3.00 $\pm$ 0.00 | 4.00 $\pm$ 0.00 | 4.00 $\pm$ 0.00 |
| Arack     | 8.50 $\pm$ 0.71 | 9.50 $\pm$ 0.71  | 10.00 $\pm$ 0.00 | 4.00 $\pm$ 0.00 | 5.00 $\pm$ 0.00 | 5.00 $\pm$ 0.00 |
| Arobase   | 9.33 $\pm$ 1.15 | 9.67 $\pm$ 0.58  | 8.67 $\pm$ 0.58  | 5.00 $\pm$ 0.00 | 5.00 $\pm$ 0.00 | 5.00 $\pm$ 0.00 |
| Astuze    | 8.67 $\pm$ 0.58 | 9.33 $\pm$ 0.58  | 9.67 $\pm$ 0.58  | 3.33 $\pm$ 0.58 | 4.00 $\pm$ 0.00 | 4.00 $\pm$ 0.00 |
| Abusson   | 9.00 $\pm$ 1.00 | 10.00 $\pm$ 1.00 | 10.00 $\pm$ 0.00 | 4.33 $\pm$ 0.58 | 4.33 $\pm$ 0.58 | 4.33 $\pm$ 0.58 |
| Autan     | 8.33 $\pm$ 0.58 | 8.67 $\pm$ 0.58  | 8.67 $\pm$ 0.58  | 3.33 $\pm$ 0.58 | 3.67 $\pm$ 0.58 | 3.67 $\pm$ 0.58 |
| Azimut    | 9.00 $\pm$ 0.00 | 9.67 $\pm$ 0.58  | 10.00 $\pm$ 0.00 | 4.00 $\pm$ 0.00 | 4.33 $\pm$ 0.58 | 4.33 $\pm$ 0.58 |
| Azzuro    | 9.00 $\pm$ 0.00 | 9.50 $\pm$ 0.71  | 10.00 $\pm$ 0.00 | 3.67 $\pm$ 0.58 | 4.33 $\pm$ 0.58 | 4.00 $\pm$ 0.00 |
| Balance   | 9.00 $\pm$ 0.00 | 9.00 $\pm$ 0.00  | 11.00 $\pm$ 0.00 | 4.00 $\pm$ 0.00 | 5.00 $\pm$ 0.00 | 5.00 $\pm$ 0.00 |
| Baltimor  | 9.00 $\pm$ 0.00 | 9.67 $\pm$ 0.58  | 9.00 $\pm$ 0.00  | 3.33 $\pm$ 0.58 | 4.67 $\pm$ 0.58 | 4.33 $\pm$ 0.58 |
| Bastide   | 9.33 $\pm$ 0.58 | 9.67 $\pm$ 0.58  | 9.33 $\pm$ 0.58  | 5.00 $\pm$ 0.00 | 5.33 $\pm$ 0.58 | 5.00 $\pm$ 0.00 |

**Table S3.** Maximum number of floret primordia and fertile floret number per spikelet in apical, central and basal spikelets for individual genotype of all the 30 cultivars in the field (mean  $\pm$  standard deviation).

| Genotype  | Apical max       | Central max      | Basal max        | Apical fertile  | Central fertile | Basal fertile   |
|-----------|------------------|------------------|------------------|-----------------|-----------------|-----------------|
| Bussard   | 9.33 $\pm$ 0.58  | 10.33 $\pm$ 0.58 | 10.33 $\pm$ 0.58 | 4.00 $\pm$ 0.00 | 5.33 $\pm$ 0.58 | 5.33 $\pm$ 0.58 |
| Tukan     | 10.00 $\pm$ 0.00 | 10.00 $\pm$ 0.00 | 10.00 $\pm$ 0.00 | 3.67 $\pm$ 0.58 | 4.67 $\pm$ 0.58 | 4.67 $\pm$ 0.58 |
| Tulsa     | 11.00 $\pm$ 0.00 | 11.00 $\pm$ 0.00 | 10.00 $\pm$ 1.00 | 4.33 $\pm$ 0.58 | 5.33 $\pm$ 0.58 | 5.33 $\pm$ 0.58 |
| Türkis    | 9.67 $\pm$ 0.58  | 10.33 $\pm$ 0.58 | 10.00 $\pm$ 1.00 | 4.00 $\pm$ 0.00 | 4.33 $\pm$ 0.58 | 4.33 $\pm$ 0.58 |
| Winnetou  | 9.67 $\pm$ 0.58  | 10.00 $\pm$ 0.00 | 10.00 $\pm$ 0.00 | 4.00 $\pm$ 0.00 | 4.33 $\pm$ 0.58 | 4.33 $\pm$ 0.58 |
| Zentos    | 9.67 $\pm$ 0.58  | 10.33 $\pm$ 0.58 | 10.00 $\pm$ 0.00 | 3.67 $\pm$ 0.58 | 5.00 $\pm$ 0.00 | 5.00 $\pm$ 0.00 |
| Zobel     | 10.50 $\pm$ 0.71 | 11.50 $\pm$ 0.71 | 10.00 $\pm$ 0.00 | 3.33 $\pm$ 0.58 | 5.00 $\pm$ 0.00 | 5.00 $\pm$ 0.00 |
| Cliff     | 10.00 $\pm$ 1.00 | 11.00 $\pm$ 1.00 | 11.00 $\pm$ 1.00 | 4.00 $\pm$ 0.00 | 5.00 $\pm$ 0.00 | 4.67 $\pm$ 0.58 |
| Dream     | 10.33 $\pm$ 0.58 | 10.33 $\pm$ 0.58 | 10.33 $\pm$ 0.58 | 3.33 $\pm$ 0.58 | 4.33 $\pm$ 0.58 | 5.00 $\pm$ 0.00 |
| Florett   | 10.00 $\pm$ 0.00 | 10.67 $\pm$ 0.58 | 10.67 $\pm$ 0.58 | 3.67 $\pm$ 0.58 | 4.67 $\pm$ 0.58 | 4.33 $\pm$ 0.58 |
| History   | 10.00 $\pm$ 0.00 | 11.00 $\pm$ 0.00 | 9.67 $\pm$ 0.58  | 4.33 $\pm$ 0.58 | 5.67 $\pm$ 0.58 | 5.00 $\pm$ 1.00 |
| Lindos    | 10.67 $\pm$ 1.15 | 11.67 $\pm$ 0.58 | 11.33 $\pm$ 0.58 | 3.67 $\pm$ 0.58 | 5.33 $\pm$ 0.58 | 5.00 $\pm$ 0.00 |
| Julius    | 10.00 $\pm$ 1.00 | 10.00 $\pm$ 1.00 | 10.00 $\pm$ 0.00 | 3.67 $\pm$ 0.58 | 4.33 $\pm$ 0.58 | 4.33 $\pm$ 0.58 |
| Exotic    | 9.33 $\pm$ 0.58  | 9.67 $\pm$ 0.58  | 9.33 $\pm$ 0.58  | 4.67 $\pm$ 0.58 | 5.00 $\pm$ 0.00 | 5.00 $\pm$ 0.00 |
| Andalou   | 9.67 $\pm$ 0.58  | 10.00 $\pm$ 1.00 | 9.67 $\pm$ 1.53  | 3.33 $\pm$ 0.58 | 4.00 $\pm$ 0.00 | 4.00 $\pm$ 0.00 |
| Loch 3754 |                  |                  |                  |                 |                 |                 |
| Adlon     | 10.00 $\pm$ 0.00 | 10.50 $\pm$ 0.58 | 9.50 $\pm$ 0.58  | 4.00 $\pm$ 0.00 | 5.00 $\pm$ 0.00 | 4.67 $\pm$ 0.58 |
| Acienda   | 9.67 $\pm$ 0.58  | 10.33 $\pm$ 0.58 | 10.33 $\pm$ 0.58 | 4.67 $\pm$ 0.58 | 5.00 $\pm$ 1.00 | 4.67 $\pm$ 0.58 |
| Aguila    | 9.67 $\pm$ 0.58  | 11.00 $\pm$ 1.00 | 10.67 $\pm$ 0.58 | 4.33 $\pm$ 0.58 | 5.33 $\pm$ 0.58 | 5.33 $\pm$ 0.58 |
| Alcasar   | 11.00 $\pm$ 0.00 | 11.00 $\pm$ 0.00 | 11.00 $\pm$ 0.00 | 3.33 $\pm$ 0.58 | 5.00 $\pm$ 0.00 | 4.33 $\pm$ 0.58 |
| Allister  | 10.00 $\pm$ 0.00 | 11.00 $\pm$ 0.00 | 10.67 $\pm$ 0.58 | 4.33 $\pm$ 0.58 | 4.67 $\pm$ 0.58 | 4.67 $\pm$ 0.58 |
| Arack     | 10.67 $\pm$ 0.58 | 11.00 $\pm$ 0.00 | 10.00 $\pm$ 0.00 | 5.33 $\pm$ 0.58 | 6.00 $\pm$ 0.00 | 6.00 $\pm$ 0.00 |
| Arobase   | 11.00 $\pm$ 0.00 | 11.67 $\pm$ 0.58 | 11.00 $\pm$ 0.00 | 4.33 $\pm$ 0.58 | 5.33 $\pm$ 0.58 | 5.33 $\pm$ 0.58 |
| Astuce    | 9.67 $\pm$ 0.58  | 10.33 $\pm$ 1.15 | 10.33 $\pm$ 0.58 | 4.33 $\pm$ 0.58 | 5.67 $\pm$ 0.58 | 5.67 $\pm$ 0.58 |
| Abusson   | 9.67 $\pm$ 0.58  | 11.00 $\pm$ 0.00 | 11.00 $\pm$ 0.00 | 4.00 $\pm$ 0.00 | 4.67 $\pm$ 0.58 | 4.67 $\pm$ 0.58 |
| Autan     | 9.33 $\pm$ 0.58  | 10.33 $\pm$ 0.58 | 9.67 $\pm$ 0.58  | 3.33 $\pm$ 0.58 | 4.33 $\pm$ 0.58 | 4.33 $\pm$ 0.58 |
| Azimut    | 9.67 $\pm$ 0.58  | 10.67 $\pm$ 0.58 | 10.33 $\pm$ 0.58 | 4.33 $\pm$ 0.58 | 5.67 $\pm$ 0.58 | 5.67 $\pm$ 0.58 |
| Azzuro    | 9.33 $\pm$ 0.58  | 10.00 $\pm$ 1.00 | 11.00 $\pm$ 0.00 | 4.67 $\pm$ 0.58 | 5.67 $\pm$ 0.58 | 5.00 $\pm$ 0.00 |
| Balance   | 10.00 $\pm$ 0.00 | 11.00 $\pm$ 0.00 | 10.67 $\pm$ 0.58 | 4.67 $\pm$ 0.58 | 5.67 $\pm$ 0.58 | 5.67 $\pm$ 0.58 |
| Baltimor  | 9.00 $\pm$ 0.00  | 10.33 $\pm$ 0.58 | 10.33 $\pm$ 0.58 | 4.00 $\pm$ 0.00 | 5.00 $\pm$ 0.00 | 5.00 $\pm$ 0.00 |
| Bastide   | 10.00 $\pm$ 0.00 | 10.33 $\pm$ 0.58 | 10.00 $\pm$ 1.00 | 4.33 $\pm$ 0.58 | 5.33 $\pm$ 0.58 | 5.00 $\pm$ 1.00 |

**Table S4.** Final grain number per spikelet in apical, central and basal spikelets and fruiting efficiency for individual genotype of all the 30 cultivars in the greenhouse (mean  $\pm$  standard deviation).

| Genotype  | apical final grain | central final grain | basal final grain | fruiting efficiency |
|-----------|--------------------|---------------------|-------------------|---------------------|
| Bussard   | 3.00 $\pm$ 0.63    | 4.17 $\pm$ 0.75     | 4.17 $\pm$ 0.75   | 14.69 $\pm$ 2.02    |
| Tukan     | 2.33 $\pm$ 0.82    | 3.33 $\pm$ 1.21     | 3.67 $\pm$ 1.51   | 15.74 $\pm$ 1.34    |
| Tulsa     | 2.67 $\pm$ 0.52    | 3.17 $\pm$ 1.47     | 4.33 $\pm$ 1.03   | 25.80 $\pm$ 4.08    |
| Türkis    | 2.50 $\pm$ 1.22    | 3.33 $\pm$ 1.51     | 2.50 $\pm$ 1.05   | 16.82 $\pm$ 0.99    |
| Winnetou  | 2.33 $\pm$ 1.03    | 4.00 $\pm$ 0.89     | 4.50 $\pm$ 1.05   | 17.44 $\pm$ 1.25    |
| Zentos    | 3.33 $\pm$ 0.52    | 4.00 $\pm$ 0.89     | 4.00 $\pm$ 0.63   | 15.68 $\pm$ 1.53    |
| Zobel     | 3.67 $\pm$ 0.58    | 5.00 $\pm$ 1.00     | 4.33 $\pm$ 0.58   | 17.34 $\pm$ 1.47    |
| Cliff     | 3.33 $\pm$ 0.82    | 4.50 $\pm$ 0.84     | 3.67 $\pm$ 1.51   | 19.74 $\pm$ 0.76    |
| Dream     | 2.67 $\pm$ 0.52    | 3.67 $\pm$ 0.52     | 3.67 $\pm$ 0.52   | 21.60 $\pm$ 2.43    |
| Florett   | 2.67 $\pm$ 0.52    | 3.14 $\pm$ 0.75     | 2.57 $\pm$ 0.82   | 19.03 $\pm$ 1.75    |
| History   | 3.00 $\pm$ 1.22    | 4.20 $\pm$ 1.30     | 2.75 $\pm$ 1.71   | 17.08 $\pm$ 1.36    |
| Lindos    | 2.40 $\pm$ 0.89    | 3.80 $\pm$ 1.10     | 2.20 $\pm$ 0.84   | 18.79 $\pm$ 0.78    |
| Julius    | 2.25 $\pm$ 0.96    | 3.33 $\pm$ 0.58     | 2.50 $\pm$ 0.58   | 18.38 $\pm$ 1.34    |
| Exotic    | 3.33 $\pm$ 0.82    | 4.33 $\pm$ 0.82     | 3.67 $\pm$ 1.03   | 15.33 $\pm$ 2.02    |
| Andalou   | 2.86 $\pm$ 0.63    | 4.00 $\pm$ 0.75     | 3.71 $\pm$ 0.84   | 16.23 $\pm$ 1.23    |
| Loch 3754 |                    |                     |                   |                     |
| Adlon     | 3.00 $\pm$ 0.89    | 4.00 $\pm$ 0.89     | 2.67 $\pm$ 1.37   | 20.56 $\pm$ 1.05    |
| Acienda   | 3.33 $\pm$ 0.82    | 3.33 $\pm$ 0.82     | 3.17 $\pm$ 0.75   | 21.76 $\pm$ 2.78    |
| Aguila    | 3.17 $\pm$ 0.98    | 3.67 $\pm$ 1.21     | 4.00 $\pm$ 1.41   | 20.38 $\pm$ 1.87    |
| Alcasar   | 2.43 $\pm$ 0.52    | 3.43 $\pm$ 1.22     | 3.71 $\pm$ 1.21   | 20.11 $\pm$ 2.30    |
| Allister  | 3.50 $\pm$ 0.55    | 4.00 $\pm$ 0.63     | 3.83 $\pm$ 1.17   | 18.57 $\pm$ 0.70    |
| Arack     | 3.17 $\pm$ 0.75    | 4.50 $\pm$ 1.05     | 4.33 $\pm$ 1.37   | 15.76 $\pm$ 2.32    |
| Arobase   | 4.33 $\pm$ 0.82    | 4.17 $\pm$ 0.98     | 4.50 $\pm$ 1.05   | 20.46 $\pm$ 1.57    |
| Astuce    | 2.80 $\pm$ 0.84    | 3.60 $\pm$ 0.89     | 3.40 $\pm$ 1.14   | 19.05 $\pm$ 1.54    |
| Abusson   | 3.00 $\pm$ 0.89    | 4.43 $\pm$ 1.03     | 4.14 $\pm$ 0.75   | 16.78 $\pm$ 1.02    |
| Autan     | 3.57 $\pm$ 1.10    | 4.14 $\pm$ 0.52     | 3.43 $\pm$ 0.55   | 14.54 $\pm$ 0.78    |
| Azimut    | 3.43 $\pm$ 0.84    | 4.00 $\pm$ 0.41     | 3.57 $\pm$ 0.75   | 22.88 $\pm$ 2.71    |
| Azzuro    | 2.86 $\pm$ 1.03    | 3.86 $\pm$ 1.33     | 4.43 $\pm$ 0.84   | 17.10 $\pm$ 0.69    |
| Balance   | 3.00 $\pm$ 1.41    | 3.67 $\pm$ 1.03     | 3.67 $\pm$ 1.37   | 17.83 $\pm$ 1.08    |
| Baltimor  | 3.00 $\pm$ 0.89    | 4.00 $\pm$ 0.89     | 3.67 $\pm$ 0.82   | 18.06 $\pm$ 0.83    |
| Bastide   | 3.33 $\pm$ 1.03    | 4.17 $\pm$ 1.17     | 4.00 $\pm$ 1.26   | 17.23 $\pm$ 0.70    |

**Table S5.** Final grain number per spikelet in apical, central and basal spikelets and fruiting efficiency for individual genotype of all the 30 cultivars in the field (mean  $\pm$  standard deviation).

| Genotype  | apical final grain | central final grain | basal final grain | fruiting efficiency |
|-----------|--------------------|---------------------|-------------------|---------------------|
| Bussard   | 1.00 $\pm$ 1.26    | 3.17 $\pm$ 0.75     | 3.83 $\pm$ 0.41   | 15.10 $\pm$ 1.69    |
| Tukan     | 3.33 $\pm$ 0.82    | 4.00 $\pm$ 0.00     | 4.00 $\pm$ 0.00   | 17.02 $\pm$ 2.60    |
| Tulsa     | 3.33 $\pm$ 0.52    | 3.67 $\pm$ 0.52     | 3.50 $\pm$ 1.05   | 15.89 $\pm$ 5.15    |
| Türkis    | 2.83 $\pm$ 1.47    | 4.17 $\pm$ 0.41     | 4.33 $\pm$ 0.52   | 20.18 $\pm$ 2.90    |
| Winnetou  | 1.83 $\pm$ 1.72    | 4.67 $\pm$ 0.52     | 4.67 $\pm$ 0.52   | 20.63 $\pm$ 5.54    |
| Zentos    | 1.83 $\pm$ 0.98    | 3.67 $\pm$ 0.52     | 3.83 $\pm$ 0.75   | 16.65 $\pm$ 5.37    |
| Zobel     | 3.17 $\pm$ 0.41    | 3.83 $\pm$ 0.41     | 3.50 $\pm$ 1.22   | 17.58 $\pm$ 1.54    |
| Cliff     | 2.67 $\pm$ 0.52    | 4.17 $\pm$ 0.75     | 3.50 $\pm$ 1.05   | 16.67 $\pm$ 3.46    |
| Dream     | 0.50 $\pm$ 1.00    | 3.50 $\pm$ 0.58     | 3.25 $\pm$ 0.96   | 16.25 $\pm$ 5.42    |
| Florett   | 2.67 $\pm$ 0.52    | 3.67 $\pm$ 0.52     | 3.33 $\pm$ 0.82   | 17.49 $\pm$ 3.67    |
| History   | 3.00 $\pm$ 0.63    | 4.17 $\pm$ 0.41     | 4.17 $\pm$ 0.75   | 15.02 $\pm$ 5.92    |
| Lindos    | 2.33 $\pm$ 0.82    | 4.00 $\pm$ 0.89     | 3.33 $\pm$ 0.82   | 28.93 $\pm$ 13.34   |
| Julius    | 2.67 $\pm$ 0.52    | 3.50 $\pm$ 0.55     | 3.67 $\pm$ 0.52   | 26.80 $\pm$ 13.58   |
| Exotic    | 3.17 $\pm$ 0.41    | 3.33 $\pm$ 0.52     | 3.17 $\pm$ 0.41   | 15.17 $\pm$ 5.59    |
| Andalou   | 3.00 $\pm$ 0.63    | 3.83 $\pm$ 0.41     | 3.67 $\pm$ 0.52   | 15.84 $\pm$ 5.66    |
| Loch 3754 |                    |                     |                   |                     |
| Adlon     | 3.83 $\pm$ 0.41    | 4.50 $\pm$ 0.55     | 4.33 $\pm$ 1.21   | 19.78 $\pm$ 9.62    |
| Acienda   | 3.67 $\pm$ 0.52    | 4.50 $\pm$ 0.55     | 3.67 $\pm$ 0.52   | 20.03 $\pm$ 7.67    |
| Aguila    | 3.17 $\pm$ 0.75    | 4.00 $\pm$ 0.00     | 3.50 $\pm$ 0.55   | 18.19 $\pm$ 3.97    |
| Alcasar   | 3.17 $\pm$ 0.75    | 4.33 $\pm$ 0.82     | 4.33 $\pm$ 0.52   | 17.76 $\pm$ 3.19    |
| Allister  | 2.50 $\pm$ 0.55    | 3.33 $\pm$ 0.52     | 3.50 $\pm$ 0.55   | 18.70 $\pm$ 5.36    |
| Arack     | 3.33 $\pm$ 0.52    | 3.83 $\pm$ 0.75     | 3.83 $\pm$ 0.41   | 15.01 $\pm$ 3.81    |
| Arobase   | 4.33 $\pm$ 0.52    | 4.67 $\pm$ 0.52     | 4.17 $\pm$ 0.41   | 18.95 $\pm$ 5.68    |
| Astuce    | 3.00 $\pm$ 0.00    | 4.17 $\pm$ 0.41     | 4.00 $\pm$ 0.00   | 14.29 $\pm$ 5.78    |
| Abusson   | 3.17 $\pm$ 0.41    | 4.17 $\pm$ 0.41     | 3.50 $\pm$ 0.55   | 17.75 $\pm$ 6.46    |
| Autan     | 3.00 $\pm$ 0.00    | 3.33 $\pm$ 0.52     | 2.83 $\pm$ 0.75   | 14.36 $\pm$ 2.33    |
| Azimut    | 3.33 $\pm$ 0.52    | 4.17 $\pm$ 0.41     | 3.83 $\pm$ 0.41   | 19.45 $\pm$ 7.31    |
| Azzuro    | 3.17 $\pm$ 0.41    | 3.50 $\pm$ 0.84     | 3.83 $\pm$ 0.41   | 19.38 $\pm$ 6.73    |
| Balance   | 3.33 $\pm$ 0.82    | 4.50 $\pm$ 0.55     | 4.33 $\pm$ 0.52   | 15.27 $\pm$ 1.07    |
| Baltimor  | 2.83 $\pm$ 0.41    | 4.00 $\pm$ 0.00     | 4.00 $\pm$ 0.00   | 17.75 $\pm$ 2.89    |
| Bastide   | 4.17 $\pm$ 1.17    | 5.00 $\pm$ 0.00     | 4.67 $\pm$ 0.52   | 16.93 $\pm$ 1.83    |

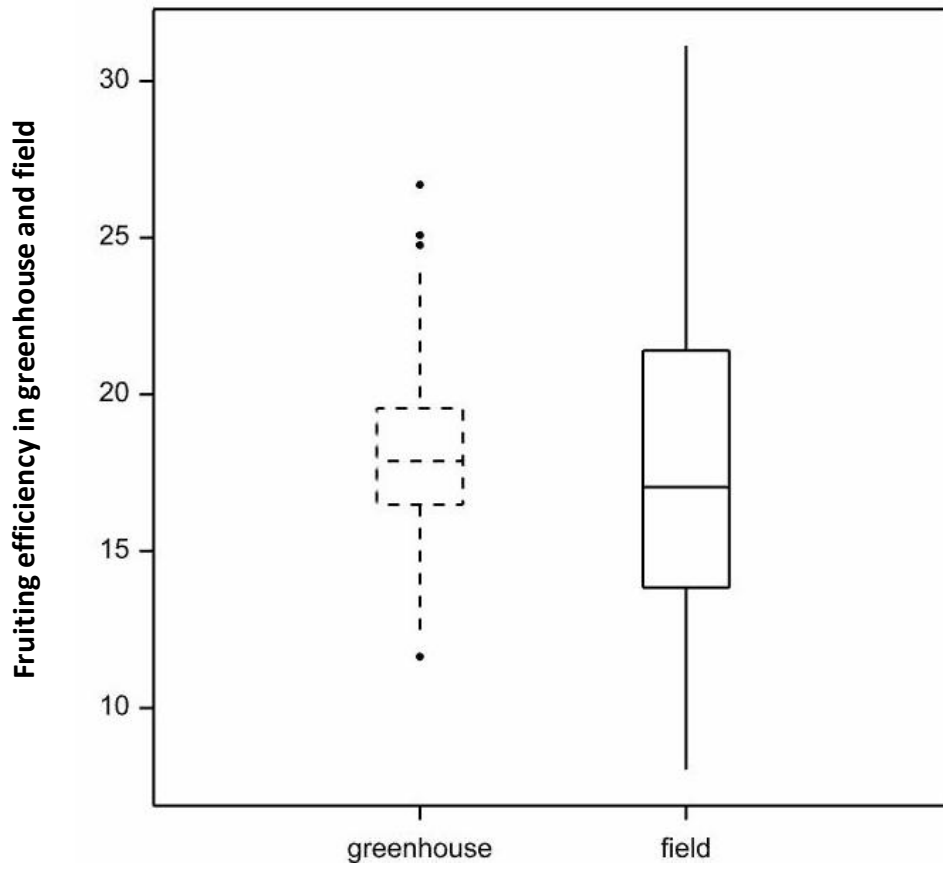

**Fig. S1. Fruiting efficiency for the 30 cultivars in the greenhouse and field.**

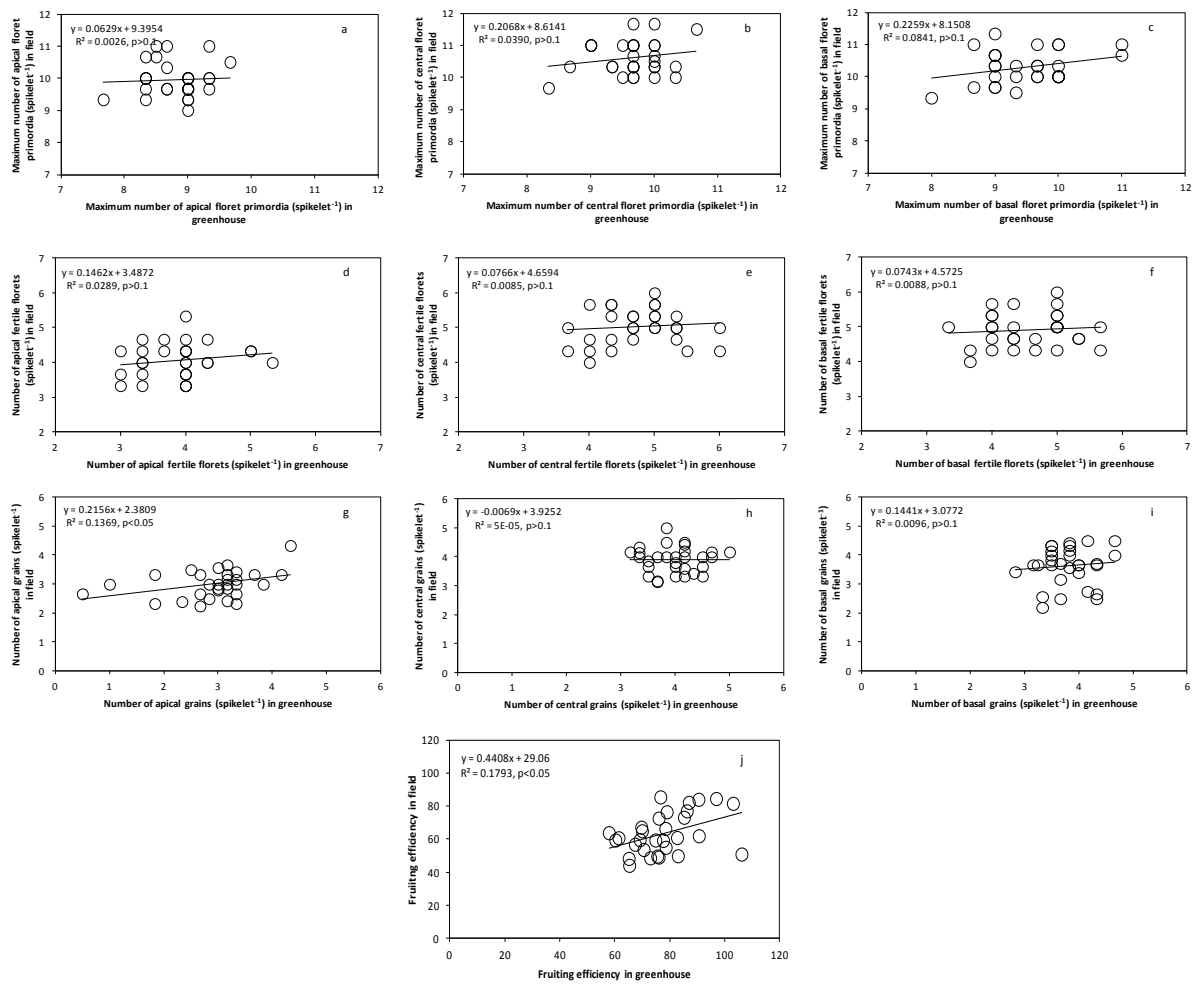

**Fig. S2. Relationships of maximum number of floret primordia (spikelet<sup>-1</sup>), number of fertile florets (spikelet<sup>-1</sup>), number of grains (spikelet<sup>-1</sup>) and fruiting efficiency between greenhouse and field.**

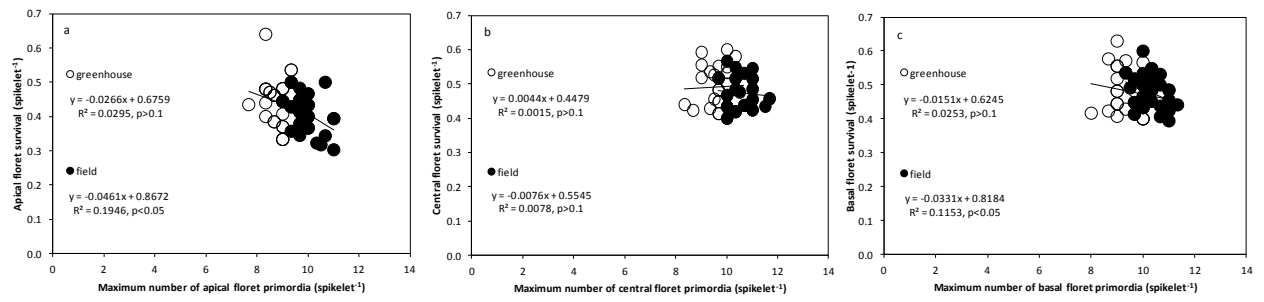

**Fig. S3.** Relationship between maximum number of floret primordia and floret survival within spikelet in apical, central and basal parts of spike under field and greenhouse conditions.



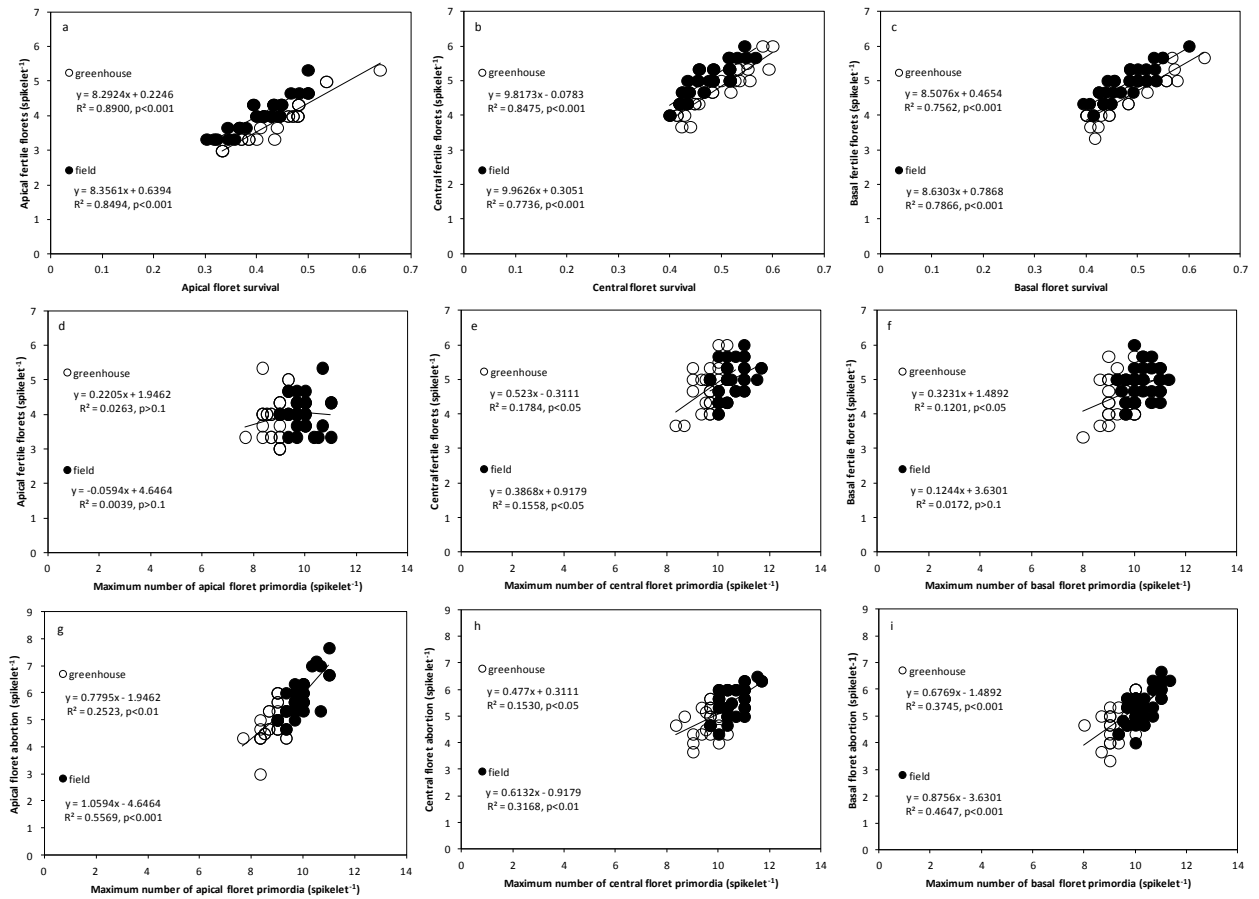

**Fig. S4.** Relationship between maximum number of floret primordia, fertile florets number and floret abortion within spikelet in apical, central and basal spikelets under field and greenhouse conditions.

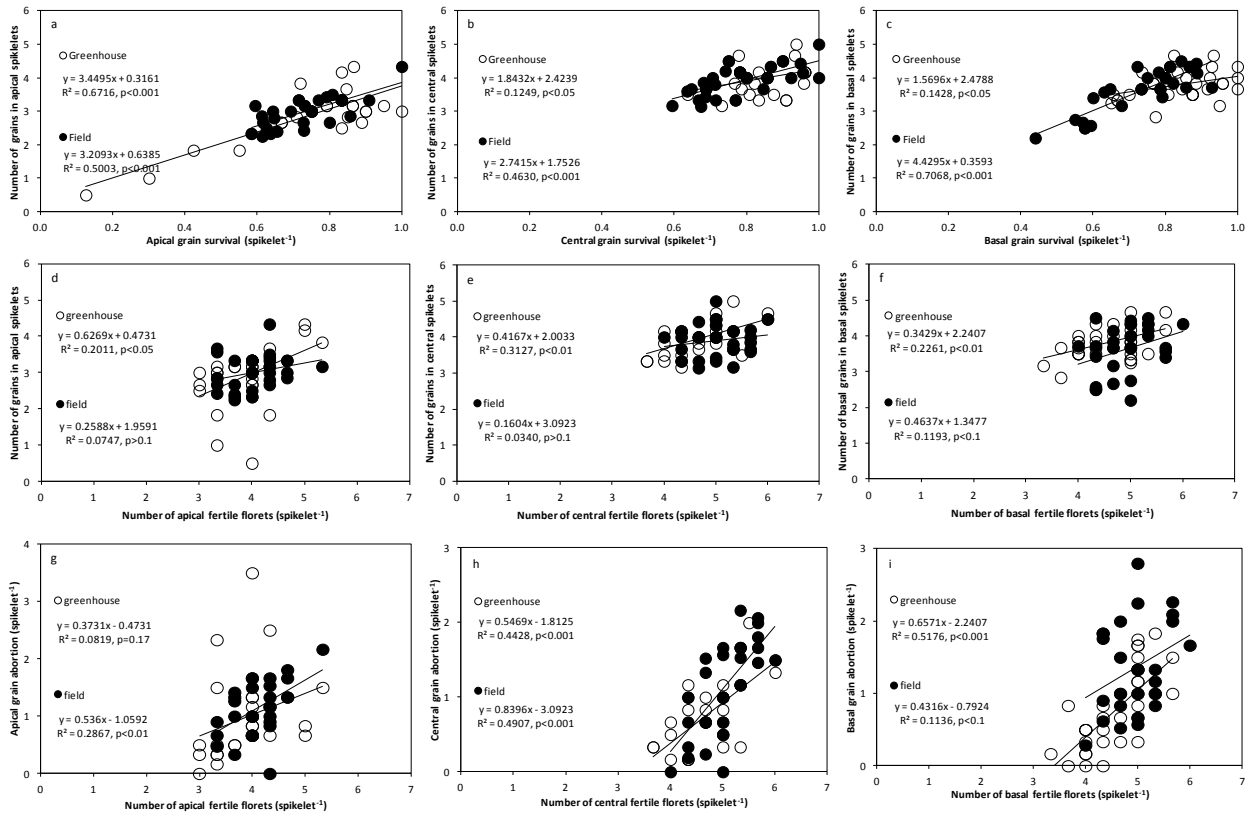

**Fig. S5.** Relationship between maximum number of fertile florets, number of grains and grain abortion per spikelet in apical, central and basal positions of spike under field and greenhouse conditions.
